# Supplementary material
Source: publisher figshare collection journal article supplement (https://tandf.figshare.com/articles/dataset/_/2067426)
Supplement: Supplementary file 1 [file 1]

## Data Supplement 2 - EMS Stakeholder Organizations Participating in the National Prehospital Evidence-Based Guidelines Strategy

| Stakeholder Organizations                                                                                                       | Strategy Action Item Roles |    |    |    |    |    |    |
|---------------------------------------------------------------------------------------------------------------------------------|----------------------------|----|----|----|----|----|----|
|                                                                                                                                 | #1                         | #2 | #3 | #4 | #5 | #6 | #7 |
| <b>Lead Organization</b>                                                                                                        |                            |    |    |    |    |    |    |
| National Association of EMS Physicians (NAEMSP)                                                                                 | A                          | R  | R  | R  | R  | R  | R  |
| <b>Strategy Sponsors</b>                                                                                                        |                            |    |    |    |    |    |    |
| Department of Transportation, National Highway Traffic Safety Administration, Office of Emergency Medical Services (NHTSA/OEMS) | C                          | R  | R  | C  | R  | R  | R  |
| Department of Health and Human Services, Health Resources and Services Administration, EMS for Children Program (HRSA/EMSC)     | C                          | R  | R  | C  | R  | R  | R  |
| <b>National Medical Organizations</b>                                                                                           |                            |    |    |    |    |    |    |
| Air Medical Physicians Association (AMPA)                                                                                       | R                          | R  | R  | C  | R  | R  | C  |
| American Academy of Emergency Medicine (AAEM)                                                                                   | R                          | R  | R  | C  | R  | R  | C  |
| American Academy of Pediatrics (AAP)                                                                                            | R                          | R  | R  | C  | R  | R  | C  |
| American College of Emergency Physicians (ACEP)                                                                                 | R                          | R  | R  | C  | R  | R  | C  |
| American College of Osteopathic Emergency Physicians (ACOEP)                                                                    | R                          | R  | R  | C  | R  | R  | C  |
| American College of Surgeons Committee on Trauma (ACS-COT)                                                                      | R                          | R  | R  | C  | R  | R  | C  |
| American Heart Association (AHA)                                                                                                | R                          | R  | R  | C  | R  | R  | C  |
| American Red Cross (ARC)                                                                                                        | C                          | C  | C  | C  | C  | C  | C  |
| American Stroke Association (ASA)                                                                                               | C                          | R  | R  | C  | R  | R  | C  |
| Emergency Nurses Association (ENA)                                                                                              | C                          | I  | I  | C  | C  | I  | I  |
| Medical Device Manufacturers Association (MDMA)                                                                                 | I                          | I  | I  | I  | I  | I  | I  |
| Society for Academic Emergency Medicine (SAEM)                                                                                  | R                          | R  | R  | C  | R  | R  | C  |
| Society of Emergency Medicine Physician Assistants (SEMPA)                                                                      | I                          | I  | I  | I  | I  | I  | I  |
| Society of Trauma Nurses (STN)                                                                                                  | I                          | I  | I  | I  | I  | I  | I  |

| Stakeholder Organizations (continued)                                                                         | Strategy Action Item Roles |    |    |    |    |    |    |
|---------------------------------------------------------------------------------------------------------------|----------------------------|----|----|----|----|----|----|
|                                                                                                               | #1                         | #2 | #3 | #4 | #5 | #6 | #7 |
| <b>Emergency Medical Services Organizations</b>                                                               |                            |    |    |    |    |    |    |
| American Ambulance Association (AAA)                                                                          | C                          | I  | C  | I  | C  | C  | C  |
| Commission on Accreditation of Ambulance Services (CAAS)                                                      | C                          | I  | C  | C  | R  | C  | C  |
| Commission on Accreditation of Medical Transport Services (CAMTS)                                             | C                          | I  | C  | C  | R  | C  | C  |
| Committee on Accreditation of Educational Programs for the Emergency Medical Services Professionals (CoAEMSP) | C                          | I  | C  | C  | C  | C  | C  |
| Congressional Fire Services Institute (CFSI)                                                                  | I                          | I  | I  | I  | I  | I  | C  |
| Continuing Education Coordinating Board for EMS (CECBEMS)                                                     | C                          | I  | C  | R  | C  | C  | I  |
| International Academies of Emergency Dispatch (IAED)                                                          | C                          | C  | C  | C  | R  | C  | C  |
| International Association of EMS Chiefs (IAEMSC)                                                              | C                          | C  | C  | C  | R  | C  | C  |
| International Association of Fire Chiefs (IAFC)                                                               | C                          | C  | C  | C  | R  | C  | C  |
| International Association of Fire Fighters (IAFF)                                                             | C                          | C  | C  | C  | R  | C  | C  |
| International Association of Flight and Critical Care Paramedics (IAFCCP)                                     | C                          | C  | C  | C  | R  | C  | C  |
| International Trauma Life Support (ITLS)                                                                      | I                          | I  | C  | C  | R  | I  | I  |
| National Association of EMS Educators (NAEMSE)                                                                | R                          | C  | C  | R  | R  | C  | I  |
| National Association of EMTs (NAEMT)                                                                          | R                          | R  | C  | R  | R  | R  | C  |
| National Association of State EMS Officials (NASEMSO)                                                         | R                          | R  | R  | R  | R  | R  | R  |
| National Collegiate Emergency Medical Services Foundation (NCEMSF)                                            | C                          | C  | C  | C  | R  | C  | C  |
| National EMS Advisory Council (NEMSAC)                                                                        | C                          | C  | C  | C  | C  | C  | C  |
| National EMS Management Association (NEMSMA)                                                                  | C                          | C  | C  | C  | R  | R  | C  |
| National Registry of EMTs (NREMT)                                                                             | R                          | R  | C  | R  | R  | R  | C  |
| National Volunteer Fire Council (NVFC)                                                                        | C                          | C  | C  | C  | R  | C  | C  |

| Stakeholder Organizations (continued)                                                                                            | Strategy Action Item Roles |    |    |    |    |    |    |
|----------------------------------------------------------------------------------------------------------------------------------|----------------------------|----|----|----|----|----|----|
|                                                                                                                                  | #1                         | #2 | #3 | #4 | #5 | #6 | #7 |
| <b>Research Institutions*</b>                                                                                                    | I                          | C  | C  | C  | C  | C  | C  |
| Baylor College of Medicine                                                                                                       |                            |    |    |    |    |    |    |
| Children's National Health System                                                                                                |                            |    |    |    |    |    |    |
| Dalhousie University                                                                                                             |                            |    |    |    |    |    |    |
| EMSC National Resource Center                                                                                                    |                            |    |    |    |    |    |    |
| Grading of Recommendations Assessment, Development, and Evaluation (GRADE) Working Group                                         |                            |    |    |    |    |    |    |
| International Liaison Committee on Resuscitation (ILCOR)                                                                         |                            |    |    |    |    |    |    |
| Johns Hopkins University                                                                                                         |                            |    |    |    |    |    |    |
| Resuscitation Outcomes Consortium (ROC)                                                                                          |                            |    |    |    |    |    |    |
| University of Maryland, National Center for the Study of Trauma and EMS                                                          |                            |    |    |    |    |    |    |
| University of North Carolina                                                                                                     |                            |    |    |    |    |    |    |
| University of Pittsburgh                                                                                                         |                            |    |    |    |    |    |    |
| <b>Federal Partners</b>                                                                                                          |                            |    |    |    |    |    |    |
| Department of Health and Human Services, Agency for Healthcare Research and Quality Center for Outcomes and Evidence (AHRQ/COE)  | C                          | C  | C  | I  | C  | C  | C  |
| Department of Health and Human Services, Health Resources and Services Administration, Office of Rural Health Policy (HRSA/ORHP) | C                          | C  | C  | I  | C  | C  | C  |
| Department of Health and Human Services, Office of the Assistant Secretary for Preparedness and Response (ASPR)                  | C                          | C  | C  | I  | C  | C  | C  |
| Department of Homeland Security, Office of Health Affairs (OHA)                                                                  | C                          | C  | C  | I  | C  | C  | C  |
| Indian Health Service, Division of Clinical and Community Services (IHS/DCCS)                                                    | C                          | C  | C  | I  | C  | C  | C  |
| National Institute of Health, Office of Emergency Care Research (NIH/OECR)                                                       | C                          | R  | C  | I  | C  | C  | R  |

\*Listed research institutions include a representative group engaged in the development of the National Prehospital Evidence-Based Guidelines Strategy and are not inclusive of all research institutions involved in prehospital EBG-related efforts. Involvement and consultation of research institutions as part of this Strategy should continue to involve a representative group, which may differ from this list.
