# Supplementary material
Source: publisher figshare collection journal article supplement (https://tandf.figshare.com/articles/dataset/_/2067426)
Supplement: Supplementary file 3 [file 1]

Archive with 2 entries (2 files):
- ipec_a_1102995_sm4024.pdf
- ipec_a_1102995_sm4001.pdf
